# Supplementary material
Source: PubMed Central journal article supplement (PMC3947849)
Supplement: NIHMS557344-supplement-SUPPL1.pdf [file NIHMS557344-supplement-SUPPL1.pdf]

Both DNA and translated protein sequence alignments were done by STRAP, a free alignment tool (<http://www.bioinformatics.org/strap/>).

The GenBank accession numbers are listed in the table below.

| Clone    | GenBank Accession# |
|----------|--------------------|
| Clone 4  | JQ395029           |
| Clone 7  | JQ395030           |
| Clone 8  | JQ395031           |
| Clone 10 | JQ395032           |
| Clone 11 | JQ395033           |
| Clone 12 | JQ395034           |
| Clone 13 | JQ395035           |
| Clone 16 | JQ395036           |
| Clone L1 | JQ395037           |
| Clone L4 | JQ395038           |

## DNA sequence alignment

L4 1 atgggtgCGTggagcaaggaaagctgttGct  
L1 1 atgggtgCGTggagcaaggaaagctgttGct  
16 1 atgggtgCGTggagcaaggaaagctGctgtGct  
13 1 atgggtgCGTggagcaaggaaagctgttGct  
12 1 atgggtgCGTggagcaaggaaagctgttGcc  
11 1 atgggtgCGTggagcaaggaaagctgttGct  
10 1 atgggtgCGTggagcaaggaaatctgttGct  
08 1 atgggtgCGTggagcaaggaaagctgttGct  
07 1 atgggtgCGTggagcaaggaaatctgttGct  
04 1 atgggtgCGTggagcaaggaaagctcttGct

---

L4 31 gtcggagttgCGgtgGctgttGcctgcagT  
L1 31 gtcggagttgCGtTggctgttGcctgcagT  
16 31 atcggagttgCGgtgGctgttGcctgcagT  
13 31 gtcggagttgCGgtgGctgttGcctgcagT  
12 31 gtcggagttgCGgtgGctgttGcctgcagT  
11 31 gtcggagttgCGgtgGctgttGcctgcagT  
10 31 gtcggagttGccgtgGctgttGcctgcagT  
08 31 gtcggagttgCGgtgGctgttGcctgcagT  
07 31 gtcggagttGccgtgGctgttGcctgcagT  
04 31 gtcggagttgCGgtgGctgttGcctgcagT

---

L4 61 gtcCagcagcaacttgaatTTTtGtGcctggg  
L1 61 gtcCagcagcaacttgaatTTTtGtGcctggg  
16 61 gtcCagcagcaatTTgaatTTTtGtGcctggg  
13 61 gtcCagcagcaacttgaatTTTtGtGcctggg  
12 61 gtcCagcagcaacttgaatTTTtGtGcctggg  
11 61 gtcCagcagcaacttgaatTTTtGtGcctggg  
10 61 gtcCagcagcaacttgaatTTTtGtGcctggg  
08 61 gtcCagcagcaacttgaatTctGtGcctggg  
07 61 gtcCagcagcaacttgaatTTTtGtGcctggg  
04 61 gtcCagcagcaacttgaatTTTtGtGcctggg

---

L4 91 cctcggcaTgctGctccagTggccgcagca  
L1 91 cctcggcaTgctGctccagTggccgcagca  
16 91 cctcggcaTgctGctccagTggccgcagca  
13 91 cctcggcaTgctGctccagTggccgcagca  
12 91 cctcggcaTgctGctccagTggccgcagca  
11 91 cctcggcaTgctGctccagTggccgcagca  
10 91 cctcggcaTgctGctccTgtggctgcagca  
08 91 cctcggcaTgctGctccagTggccgcagca  
07 91 cctcggcaTgctGctccTgtggctgcagca  
04 91 cctcggcaTgctGctccagTggccgcagca

---

L4 121 gcagccagcaTgatgatggctcctgCGgct

L1 121 gcagccagcatgatgatggctcctgcggt  
16 121 gcagccagcatgatgatggctcctgcggt  
13 121 gcagccagcatgatgatggctcctgctgct  
12 121 gcagccagcatgatgatggctcctgcggt  
11 121 gcagccagcatgatgatggctcctgcggt  
10 121 gcagccagcatgatgatggctcctgcggt  
08 121 gcagccagcatgatgatggctcctgcggt  
07 121 gcagccagcatgatgatggctcctgcggt  
04 121 gcagccagcatgatgatggctcctgcggt

---

L4 151 tttgctgatgagatcggcgatgctgcaaag  
L1 151 tttgctgatgagattggcgatgctgcaaag  
16 151 tttgctgatgagatcggcgatgctgcaaag  
13 151 tttgctgatgagatcggcgatgctgcaaag  
12 151 tttgctgatgagatcggcgatgctgcaaag  
11 151 tttgctgatgagattggcgatgctgcaaag  
10 151 tttgctgatgagattggcgatgctgcaaag  
08 151 tttgctgatgagattggcgatgctgcaaag  
07 151 tttgctgatgagattggcgatgctgcaaag  
04 151 tttgctgatgagattggcgatgctgcaaag

---

L4 181 aagcttggagatgcttctactcttttgcc  
L1 181 aagcttggagatgcttctactcttttgcc  
16 181 aagcttggagatgcttctactcttttgcc  
13 181 aagcttggagatgcttctactcttttgcc  
12 181 aagcttggagatgcttctactcttttgcc  
11 181 aagcttggagatgcttctactcttttgcc  
10 181 aagcttggagatgcttctactcttttgcc  
08 181 aagcttggagatgcttctactcttttgcc  
07 181 aagcttggagatgcttctactcttttgcc  
04 181 aagcttggagatgcttctactcttttgcc

---

L4 211 aaggaagtggattggaaacaatggaaattttc  
L1 211 aaggaagtggattggaaacaatggaaattttc  
16 211 aaggaagtggattggaaacaatggaaattttc  
13 211 aaggaagtggattggaaacaatggaaattttc  
12 211 aaggaagtggattggaaacaatggaaattttc  
11 211 aaggaagtggattggaaacaatggaaattttc  
10 211 aaggaagtggattggaaacaatggaaattttc  
08 211 aaggaagtggattggaaacaatggaaattttc  
07 211 aaggaagtggattggaaacaatggaaattttc  
04 211 aaggaagtggattggaaacaatggaaattttc

---

L4 241 ctccaggccccctggcaagtttcagcccttg  
L1 241 ctccaggccccctggcaagtttcagcccttg  
16 241 ctccaggccccctggcaagtttcagcccttg

13 241 ctccaggccccctggcaagtttcagcccttg  
12 241 ctgcaggccccctggtaagtttcagcccttg  
11 241 ctccaggccccctggcaagtttcagcccttg  
10 241 ctccaggccccctggcaagtttcagcccttg  
08 241 cttcaggccccctggcaagtttcagcccttg  
07 241 ctccaggccccctggcaagtttcagcccttg  
04 241 ctccaggccccctggcaagtttcagcccttg

---

L4 271 gaggcgttgaaagcaattgacaagatgatc  
L1 271 gaggcgttgaaagcaattgacaagatgatc  
16 271 gaggcgttgaaagcaattgacaagatgatc  
13 271 aaggcgttgaaagcaattgacaagatgatc  
12 271 aaggcgttgaaagcaattgacaagatgatc  
11 271 aaggcgttgaaagcaattgacaagatgatc  
10 271 caggcgttgaaagcaattgacaagatgatc  
08 271 gaggcgttgaaagcaattgacaagatgatc  
07 271 caggcgttgaaagcaattgacaagatgatc  
04 271 aaggcgttgaaagcaattgacaagatgatc

---

L4 301 gaaatggggggcagccgctgatcccaagctt  
L1 301 gaaatggggggcagccgccgatcccaagctt  
16 301 gaaatggggggcagctgccgatcccaagctt  
13 301 gaaatggggggcagccgccgatcccaagctt  
12 301 gaaatggggggcagccgccgatccaagctt  
11 301 gagaatggggggcagccgccgatcccaagctt  
10 301 gaaatggggggcagccgccgatcccaagctt  
08 301 gaaatggggggcagccgccgatcccaagctt  
07 301 gaaatggggggcagccgccgatcccaagctt  
04 301 gaaatggggggcagccgccgatcccaagctt

---

L4 331 ctcaaagaggcagcagaagcacatcacaag  
L1 331 ctcaaagaggcagcagaagcacatcacaag  
16 331 ctcaaagaggcagcagaagcacatcacaag  
13 331 ctcaaagaggcagcgggaagcacatcacaag  
12 331 ctcaaagaggcagcagaagcacatcacaag  
11 331 ctcaaagaggcagcagaagcacatcacaag  
10 331 ctcaaagaggcagcagaagcacatcacaag  
08 331 ctcaaagaggcagcagaagcacatcacaag  
07 331 ctcaaagaggcagcagaagcacatcacaag  
04 331 ctcaaagaggcagcagaagcacatcacaag

---

L4 361 gccattggggagcattcagcggggccaaaatggt  
L1 361 gccatcggggagcattcagcggggccaaaatggt  
16 361 gccatcggggagcattcagcggggccaaaatggt  
13 361 gccattggggagcattcagcggggccaaaatggt  
12 361 gccatcggggagcattcagcggggccaaaatggt

11 361 gccatcgggagcattcagcggggccaaaagggt  
10 361 gccattgggagcattcagcggggccaaatgggt  
08 361 gccatcgggagcattcagcggggccaaatgggt  
07 361 gccattgggagcattcagcggggccaaatgggt  
04 361 gccatcgggagcattcagcggggccaaaagggt

---

L4 391 gtgacttcgctgctgactgggatgcectg  
L1 391 gtgacttcaectgctgactgggatgcectg  
16 391 gtgacttcgctgctgactgggatgcectg  
13 391 gtgacttcgctgctgactgggatgcectg  
12 391 gtgacttcgctgctgactgggatgcectg  
11 391 gtgacttcgctgctgactgggatgcectg  
10 391 gtgacttcgctgctgactgggatgcectg  
08 391 gtgacttcgctgctgactgggatgcectg  
07 391 gtgacttcgctgctgactgggatgcectg  
04 391 gtgacttcgctgctgactgggatgcectg

---

L4 421 aatgcagcccttggccgctagtcgcttcg  
L1 421 aatgcagcccttggccgctagtcgcttcg  
16 421 aatgcagcccttggccgctagtcgcttcg  
13 421 aatgcagccctaggccgctagtcgcttcg  
12 421 aatgcagcccttggccgctagtcgcttcg  
11 421 aatggggcccttggccgctagtcgcttcg  
10 421 aatgcagcccttggccgctagtcgcttcg  
08 421 aatgcagcccttggccgctagtcgcttcg  
07 421 aatgcagcccttggccgctagtcgcttcg  
04 421 aatgcagcccttggccgctagtcgcttcg

---

L4 451 gtccccaaagcaaaggtcattggccgtttac  
L1 451 gtccccaaagcaaaggtcattggccgtttac  
16 451 gtccccaaagcaaaggtcattggccgtttac  
13 451 gtccccaaagcaaaggtcattggccgtttac  
12 451 gtccccaaagcaaaggtcattggccgtttac  
11 451 gtccccaaagcaaaggtcattggccgtttac  
10 451 gtccccaaagcaaaggtcattggccgtttac  
08 451 gtccccaaagcaaaggtcattggccgtttac  
07 451 gtccccaaagcaaaggtcattggccgtttac  
04 451 gtccccaaagcaaaggtcattggccgtttac

---

L4 481 gattcagtgaaagacattcaggacccccca  
L1 481 gattcagtgaaagacattcaggacccccaaa  
16 481 gattcagtgaaagacattcaggacccccaca  
13 481 gattcagtgaaagacattcaggacccccaaa  
12 481 gattcagtgaaagacattcaggacccccaaa  
11 481 gattcagtgaaagacattcaggacccccaaa  
10 481 gattcagtgaaagacattcaggacccccaaa

08 481 gattcagtgaaagacatcacggacccccaaa  
07 481 gattcagtgaaagacatcacggacccccaaa  
04 481 gattcagtgaaagacatcacggacccccaaa

---

L4 511 gtgccagcttacaatgaagtccttgggtgaaac  
L1 511 gtgccagcttacaatgaagtccttgggtgaaac  
16 511 gtgccagcttacaatgaagtccttgggtgaaac  
13 511 gtgccagcttacaatgaagtccttgggtgaaac  
12 511 gtgccagcttacaatgaagtccttgggtgaaac  
11 511 gtgccagcttacaatgaagtccttgggtgaaac  
10 511 gtgccagcttacaatgaagtccttgggtgaaac  
08 511 gtgccagcttacaatgaagtccttgggtgaaac  
07 511 gtgccagcttacaatgaagtccttgggtgaaac  
04 511 gtgccagcttacaatgaagtccttgggtgaaac

---

L4 541 gggcccgatgctgagaaggcctaccaagca  
L1 541 gggcccgatgctgagaaggcctaccaagca  
16 541 gggcccgatgctgagaaggcctaccaagca  
13 541 gggcccgatgctgagaaggcctaccaagca  
12 541 gggcccgatgctgagaaggcctaccaagca  
11 541 gggcccgatgctgagaaggcctaccaagga  
10 541 gggcccgatgctgagaaggcctaccaagca  
08 541 gggcccgatgctgagaaggcctaccaagca  
07 541 gggcccgatgctgagaaggcctaccaagca  
04 541 gggcccgatgctgagaaggcctaccaagga

---

L4 571 ttcttggaaattcaaggatgttgttgcaaag  
L1 571 ttcttggaaattcaaggatgttgttgcaaag  
16 571 ttcttggaaattcaaggatgttgttgcaaag  
13 571 ttcttggaaattcaaggatgttgttgcaaag  
12 571 ttcttggaaattcaaggatgttgttgcaaag  
11 571 ttcttggaaattcaaggatgttgttgcaaag  
10 571 ttcttggaaattcaaggatgttgttgcaaag  
08 571 ttcttggaaattcaaggatgttgttgcaaag  
07 571 ttcttggaaattcaaggatgttgttgcaaag  
04 571 ttcttggaaattcaaggatgttgttgcaaag

---

L4 601 aaccaggtgaccaccgccagtgctcctgca  
L1 601 aaccaggtgaccactgccagtgctcctgca  
16 601 aaccaggtgaccaccgccagtgctcctgca  
13 601 aaccaggtgaccaccgccagtgccctgcg  
12 601 aaccaggtgaccactgccagtgctcctgca  
11 601 aaccaggtgaccagcgccagtgctcctgca  
10 601 aaccaggtgaccaccgccagtgctcctgca  
08 601 aaccaggtgaccaccgccagtgctcctgca  
07 601 aaccaggtgaccaccgccagtgctcctgca

04 601 aaccaggtaaccaagcgccagtgctcctgca

---

L4 631 gttgtgccttctggggacaagattggtgaa  
L1 631 gttgtgccttctggggacaagattggtgaa  
16 631 gttgtgccttctggggacaagattggtgaa  
13 631 gttgtgccttctggggacaagattggtgta  
12 631 gttgtgccttcggcgacaagattggtgta  
11 631 gttgtgccttctggggacaagattggtgta  
10 631 gttgtgcea tctggggacaagattggtgaa  
08 631 gttgtgccttctggggacaagattggtgta  
07 631 gttgtgcea tctggggacaagattggtgaa  
04 631 gttgtgccttctggggacaagattggtgta

---

L4 661 gctgcaaaagcgttgtecgatgcatcctat  
L1 661 gctgcaaaagcgttgtecgatgcatcctat  
16 661 gctgcaaaagcgttgtecgatgcatcctat  
13 661 gctgcaaaagcgttgtecgatgcatcctat  
12 661 gctgcaaaagcgttgtecgatgcatcctat  
11 661 gctgcaaaagcgttgtecgatgcatcctat  
10 661 gctgcaaaagcgttgtecgatgcatcctat  
08 661 gctgcaaaagcgttgtecgatgcatcctat  
07 661 gctgcaaaagcgttgtecgatgcatcctat  
04 661 gctgcaaaagcgttgtecgatgcatcctat

---

L4 691 cctttcatcaaggacatcgattggetgtcg  
L1 691 cca ttcatacaaggacatcgattggetgtcg  
16 691 cctttcatcaaggacatcgattggetgtcg  
13 691 cctttcatcaaggacatcgattggetgtcg  
12 691 cctttcatcaaggacatcgattggetgtcg  
11 691 cctttcatcaaggacatcgatcggetgtcg  
10 691 cca ttcatacaaggacatcgattggetgtcg  
08 691 cctttcatcaaggacatcgattggetgtcg  
07 691 cca ttcatacaaggacatcgattggetgtcg  
04 691 cctttcatcaaggacatcgattggetgtcg

---

L4 721 gacatctacctgaagccgctgcccggcaag  
L1 721 gacatctacctgaagccgctgcccggcaag  
16 721 gacatttacctgaagccgctgcccggcaag  
13 721 gacatctacctgaagccgctgcccggcaag  
12 721 gacatttacctgaagccgctgcccggcaag  
11 721 gacatctacctgaagccgctgcccggcaag  
10 721 gacatctacctgaagcccctgaccggcaag  
08 721 gacatctacctgaagccgctgcccggcaag  
07 721 gacatctacctgaagcccctgcccggcaag  
04 721 gacatctacctgaagccgctgcccggcaag

---

L4 751 actgccccagagaccctgaaagccattgac  
L1 751 actgccccagagaccctgaaagccattgac  
16 751 actgccccagagaccctgaaagccattgac  
13 751 actgccccagagaccctgaaagccattgac  
12 751 actgccccagagaccctgaaagccattgac  
11 751 actgccccagagaccctgaaagccattgac  
10 751 actgccccagagaccctgaaagccattgac  
08 751 actgccccagagaccctgaaagccattgac  
07 751 actgccccagagaccctgaaagccattgac  
04 751 actgccccagagaccctgaaagccattgac

---

L4 781 aagatgatcgtgatggggcgccaagatggat  
L1 781 aagatgatcgtgatggggcgccaagatggat  
16 781 aagatgatcgtgatggggcgccaagatggat  
13 781 aagatgatcgtgatggggcgccaagatggat  
12 781 aagatgatcgtgatggggcgccaagatggat  
11 781 aagatgatcgtgatggggcgccaagatggat  
10 781 aagatgatcgtgatggggcgccaagatggat  
08 781 aagatgatcgtgatggggcgccaagatggat  
07 781 aagatgatcgtgatggggcgccaagatggat  
04 781 aagatgatcgtgatggggcgccaagatggat

---

L4 811 ggaaaacctcttgaaggcagcagcagaggca  
L1 811 ggaaaacctcttgaaggcagcagcagaggca  
16 811 ggaaaacctcttgaaggcagcagcagaggca  
13 811 ggaaaacctcttgaaggcagcagcagaggca  
12 811 ggaaaacctcttgaaggcagcagcagaggca  
11 811 ggaaaacctcttgaaggcagcagcagaggca  
10 811 ggaaaacctcttgaaggcagcagcagaggca  
08 811 ggaaaacctcttgaaggcagcagcagaggca  
07 811 ggaaaacctcttgaaggcagcagcagaggca  
04 811 ggaaaacctcttgaaggcagcagcagaggca

---

L4 841 caccacaaggccaatggcagcattgatgcc  
L1 841 caccacaaggccaatggcagcattgatgcc  
16 841 caccacaaggccaatggcagcattgatgcc  
13 841 caccacaaggccaatggcagcattgatgcc  
12 841 cggccacaaggccaatggcagcattgatgcc  
11 841 caccacaaggccaatggcagcattgatgcc  
10 841 caccacaaggccatattggcagcattgatgcc  
08 841 caccacaaggccaatggcagcattgatgcc  
07 841 caccacaaggccatattggcagcattgatgcc  
04 841 caccacaaggccaatggcagcattgatgcc

---

L4 871 aacgggtgtgacgtccgcgccgactacgaa  
L1 871 aacgggtgtgacgtccgcgccgactacgaa



16 871 aacgggtgtgacgtccgcgccgactacgaa  
13 871 aaggggtgtgacgtccgcagccgactacaaa  
12 871 aaggggtgtgacgtccgcagccgactacgaa  
11 871 aaggggtgtgacgtccgcgccgactacgaa  
10 871 aatgggtgtgacgtccgcgccgactacgaa  
08 871 aaggggtgtgaca<sup>c</sup>tccgcgccgactacgaa  
07 871 aatgggtgtgacgtccgcgccgactacgaa  
04 871 aaggggtgtgacgtccgcgccgactacgaa

---

L4 901 gctgtgaa<sup>t</sup>gcagca<sup>t</sup>ttggggcgcttgggtg  
L1 901 gctgtgaa<sup>t</sup>gcagca<sup>t</sup>ttggggcgcttgggtg  
16 901 gctgtgaa<sup>t</sup>gcagca<sup>t</sup>ttggggcgcttgggtg  
13 901 gctgtgaa<sup>t</sup>gcagca<sup>t</sup>ttggggcgcttgggtg  
12 901 gctgtgaa<sup>t</sup>gcagc<sup>c</sup>ttggggcgcttgggtg  
11 901 gctgtgaa<sup>t</sup>gcagc<sup>c</sup>ttggggcgcttgggtg  
10 901 gctgtgaa<sup>t</sup>gcagca<sup>t</sup>ttggggcgcttgggtg  
08 901 gctgtgaa<sup>t</sup>gcagca<sup>t</sup>ttggggcgcttgggtg  
07 901 gctgtgaa<sup>t</sup>gcagca<sup>t</sup>ttggggcgcttgggtg  
04 901 gctgtgaa<sup>t</sup>gcagca<sup>t</sup>ttggggcgcttgggtg

---

L4 931 gca<sup>t</sup>ccg<sup>t</sup>gcccc<sup>a</sup>ag<sup>t</sup>ccact<sup>g</sup>tca<sup>t</sup>ggac  
L1 931 gca<sup>t</sup>ccg<sup>t</sup>gcccc<sup>a</sup>ag<sup>t</sup>ccact<sup>g</sup>tca<sup>t</sup>ggac  
16 931 gca<sup>t</sup>ccg<sup>t</sup>gcccc<sup>a</sup>ag<sup>t</sup>ccac<sup>a</sup>g<sup>t</sup>ca<sup>t</sup>ggac  
13 931 gca<sup>t</sup>ccg<sup>t</sup>gcccc<sup>a</sup>ag<sup>t</sup>ccact<sup>g</sup>tca<sup>t</sup>ggac  
12 931 gca<sup>t</sup>ccg<sup>t</sup>gcccc<sup>a</sup>ag<sup>t</sup>ccact<sup>g</sup>tca<sup>t</sup>ggg<sup>c</sup>  
11 931 gca<sup>t</sup>ccg<sup>t</sup>gcccc<sup>a</sup>ag<sup>t</sup>ccact<sup>g</sup>tca<sup>t</sup>ggac  
10 931 gca<sup>t</sup>ccg<sup>t</sup>gcccc<sup>a</sup>ag<sup>t</sup>ccact<sup>g</sup>tca<sup>t</sup>ggac  
08 931 gca<sup>t</sup>ccg<sup>t</sup>gcccc<sup>a</sup>ag<sup>t</sup>ccact<sup>g</sup>tca<sup>t</sup>ggac  
07 931 gca<sup>t</sup>ccg<sup>t</sup>gcccc<sup>a</sup>ag<sup>t</sup>ccact<sup>g</sup>tca<sup>t</sup>ggac  
04 931 gca<sup>t</sup>ccg<sup>t</sup>gcccc<sup>a</sup>ag<sup>t</sup>ccact<sup>g</sup>tca<sup>t</sup>ggac

---

L4 961 g<sup>t</sup>t<sup>g</sup>taca<sup>a</sup>ttcca<sup>t</sup>gg<sup>c</sup>tgg<sup>c</sup>atcg<sup>t</sup>ttgat  
L1 961 g<sup>t</sup>t<sup>g</sup>taca<sup>a</sup>ttcca<sup>t</sup>gg<sup>c</sup>caa<sup>a</sup>g<sup>t</sup>cg<sup>t</sup>ttgat  
16 961 g<sup>t</sup>t<sup>g</sup>taca<sup>a</sup>ttcca<sup>t</sup>gg<sup>c</sup>tgg<sup>c</sup>atcg<sup>t</sup>ttgat  
13 961 g<sup>t</sup>t<sup>g</sup>taca<sup>a</sup>ttcca<sup>t</sup>gg<sup>c</sup>tgg<sup>c</sup>atcg<sup>t</sup>ttgat  
12 961 g<sup>t</sup>t<sup>g</sup>taca<sup>a</sup>ttcca<sup>t</sup>gg<sup>c</sup>tgg<sup>c</sup>atcg<sup>t</sup>ttgat  
11 961 g<sup>t</sup>t<sup>g</sup>taca<sup>a</sup>ttcca<sup>t</sup>gg<sup>c</sup>tgg<sup>c</sup>atcg<sup>t</sup>ttgat  
10 961 g<sup>t</sup>t<sup>g</sup>taca<sup>a</sup>ttcca<sup>t</sup>gg<sup>c</sup>caa<sup>a</sup>g<sup>t</sup>cg<sup>t</sup>ttgat  
08 961 g<sup>t</sup>t<sup>g</sup>taca<sup>a</sup>ttcca<sup>t</sup>gg<sup>c</sup>tgg<sup>c</sup>atcg<sup>t</sup>ttgat  
07 961 g<sup>t</sup>t<sup>g</sup>taca<sup>a</sup>ttcca<sup>t</sup>gg<sup>c</sup>caa<sup>a</sup>g<sup>t</sup>cg<sup>t</sup>ttgat  
04 961 g<sup>t</sup>t<sup>t</sup>taca<sup>a</sup>ttcca<sup>t</sup>gg<sup>c</sup>tgg<sup>c</sup>atcg<sup>t</sup>ttgat

---

L4 991 tccaccg<sup>t</sup>gacca<sup>a</sup>caaca<sup>t</sup>gtt<sup>t</sup>ctcgaag  
L1 991 tccaccg<sup>t</sup>gacca<sup>a</sup>caaca<sup>t</sup>gtt<sup>t</sup>ctcgaag  
16 991 t<sup>c</sup>gaccg<sup>t</sup>gacca<sup>a</sup>caaca<sup>t</sup>gtt<sup>t</sup>ctcgaag  
13 991 tccaccg<sup>t</sup>gacca<sup>a</sup>caaca<sup>t</sup>gtt<sup>t</sup>ctcgaag

12 991 tccaccgtgaccaacaacatgttctcgaag  
 11 991 tccaccgtgaccaacaacatgttctcgaag  
 10 991 tccaccgtgaccaacaacatgttctcgaag  
 08 991 tccaccgtgaccaacaacatgttctcgaag  
 07 991 tccaccgtgaccaacaacatgttctcgaag  
 04 991 tccaccgtgaccaacaatagttctcgaag

---

L4 1021 gtgaa<sup>tcca</sup>ttggatgcaatggctg<sup>ccg</sup>cc  
 L1 1021 gtgaa<sup>tcca</sup>ttggatgcaatggctg<sup>ccg</sup>cc  
 16 1021 gtgaa<sup>tcca</sup>ttggatgcaatggctg<sup>ccg</sup>cc  
 13 1021 gtgaa<sup>tcca</sup>ttggatgcaatg<sup>ccg</sup>cc  
 12 1021 gtgaa<sup>tcca</sup>ttggatgca<sup>g</sup>ttggctg<sup>ccg</sup>cc  
 11 1021 gtgaa<sup>tcca</sup>ttggatgcaatggctg<sup>ccg</sup>cc  
 10 1021 gtgaa<sup>tcca</sup>ttggatgcaatggctg<sup>ccg</sup>cc  
 08 1021 gtgaa<sup>tcca</sup>ttggatgcaatggctg<sup>ccg</sup>cc  
 07 1021 gtgaa<sup>tcca</sup>ttggatgcaatggctg<sup>ccg</sup>cc  
 04 1021 gtgaa<sup>tcca</sup>ttggatgcaatggctg<sup>ccg</sup>cc

---

L4 1051 aagggtttctacac<sup>ctt</sup>caaggatg<sup>ttg</sup>tg  
 L1 1051 aagggtttctacac<sup>ctt</sup>caaggatg<sup>ttg</sup>tg  
 16 1051 aagggtttctacac<sup>ctt</sup>caaggatg<sup>ttg</sup>tg  
 13 1051 aagggtttctacac<sup>ctt</sup>caagatg<sup>ctg</sup>tg  
 12 1051 aagggtttctacac<sup>ctt</sup>caaggatg<sup>ttg</sup>tg  
 11 1051 aagggtttctacac<sup>ctt</sup>caaggatg<sup>ttg</sup>tg  
 10 1051 aagggtttctacac<sup>ctt</sup>caaggatg<sup>ttg</sup>tg  
 08 1051 aagggtttctacac<sup>ctt</sup>caaggatg<sup>ttg</sup>tg  
 07 1051 aagggtttctacac<sup>ctt</sup>caaggatg<sup>ttg</sup>tg  
 04 1051 aagggtttctacac<sup>ctt</sup>caaggatg<sup>ttg</sup>tg

---

L4 1081 gaggttcccagecgtgaagg<sup>t</sup>gaa  
 L1 1081 gaggttcccagecgtgaagg<sup>t</sup>gaa  
 16 1081 gaggttcccagecgtgaagg<sup>t</sup>gaa  
 13 1081 gaggttcccagecgtgaagg<sup>t</sup>gaa  
 12 1081 gaggttcccagecgtgaagg<sup>t</sup>gaa  
 11 1081 ggggttcccagecgtgaagg<sup>t</sup>gaa  
 10 1081 gaggttcccagecgtgaagg<sup>t</sup>gaa  
 08 1081 gaggttcccagecgtgaagg<sup>t</sup>gaa  
 07 1081 gaggttcccagecgtgaagg<sup>t</sup>gaa  
 04 1081 gaggttcccagecgtgaagg<sup>t</sup>gaa

Translated protein sequence alignment

Translation\_of\_L4 1 MVRGARKAVAVGVAVAVACSVQ<sup>QHL</sup>NFVPG  
 Translation\_of\_L1 1 MVRGARKAVAVGVALAVACSVQ<sup>QHL</sup>NFVPG  
 Translation\_of\_16 1 MVRGARKAAAI<sup>G</sup>VAVAVACSVQ<sup>QHL</sup>NFVPG  
 Translation\_of\_15 1 MVRGARKAVAVGVAVAVACSVQ<sup>QHL</sup>NSVPG

Translation\_of\_13 1 MVRGARKAVAVGVAVAVACSVQQHLNFVPG  
Translation\_of\_12 1 MVRGARKAVAVGVAVAVACSVQQHLNFVPG  
Translation\_of\_11 1 MVRGARKAVAVGVAVAVACSVQQHLNFVPG  
Translation\_of\_10 1 MVRGARKSVAVGVAVAVACSVQQHLNFVPG  
Translation\_of\_08 1 MVRGARKAVAVGVAVAVACSVQQHLNSVPG  
Translation\_of\_07 1 MVRGARKSVAVGVAVAVACSVQQHLNFVPG  
Translation\_of\_04 1 MVRGARKALAVGVAVAVACSVQQHLNFVPG

---

Translation\_of\_L4 31 PRHAAPVAAAAASMMMAPAAFADFIGDAAK  
Translation\_of\_L1 31 PRHAAPVAAAAASMMMAPAAFADFIGDAAK  
Translation\_of\_16 31 PRHAAPVAAAAASMMMAPAAFADFIGDAAK  
Translation\_of\_15 31 PRHAAPVAAAAASMMMAPAAFADFIGDAAK  
Translation\_of\_13 31 PRHAAPVAAAAASMMMAPAAFADFIGDAAK  
Translation\_of\_12 31 PRHAAPVAAAAASMMMAPAAFADFIGDAAK  
Translation\_of\_11 31 PRHAAPVAAAAASMMMAPAAFADFIGDAAK  
Translation\_of\_10 31 PRHAAPVAAAAASMMMAPAAFADFIGDAAK  
Translation\_of\_08 31 PRHAAPVAAAAASMMMAPAAFADFIGDAAK  
Translation\_of\_07 31 PRHAAPVAAAAASMMMAPAAFADFIGDAAK  
Translation\_of\_04 31 PRHAAPVAAAAASMMMAPAAFADFIGDAAK

---

Translation\_of\_L4 61 KLGDAYSFAKEVDWNNGIFLQAPGKFQPL  
Translation\_of\_L1 61 KLGDAYSFAKEVDWNNGIFLQAPGKFQPL  
Translation\_of\_16 61 KLGDAYSFAKEVDWNNGIFLQAPGKFQPL  
Translation\_of\_15 61 KLGDAYSFAKEVDWNNGIFLQAPGKFQPL  
Translation\_of\_13 61 KLGDAYSFAKEVDWNNGIFLQAPGKFQPL  
Translation\_of\_12 61 KLGDAYSFAKEVDWNNGIFLQAPGKFQPL  
Translation\_of\_11 61 KLGDAYSFAKEVDWNNGIFLQAPGKFQPL  
Translation\_of\_10 61 KLGDAYSFAKEVDWNNGIFLQAPGKFQPL  
Translation\_of\_08 61 KLGDAYSFAKEVDWNNGIFLQAPGKFQPL  
Translation\_of\_07 61 KLGDAYSFAKEVDWNNGIFLQAPGKFQPL  
Translation\_of\_04 61 KLGDAYSFAKEVDWNNGIFLQAPGKFQPL

---

Translation\_of\_L4 91 EALKAIDKMIEMGAAADPKLLKEAAEAHHK  
Translation\_of\_L1 91 EALKAIDKMIEMGAAADPKLLKEAAEAHHK  
Translation\_of\_16 91 EALKAIDKMIEMGAAADPKLLKEAAEAHHK  
Translation\_of\_15 91 EALKAIDKMIEMGAAADPKLLKEAAEAHHK  
Translation\_of\_13 91 KALKAIDKMIEMGAAADPKLLKEAAEAHHK  
Translation\_of\_12 91 KALKAIDKMIEMGAAADPKLLKEAAEAHHK  
Translation\_of\_11 91 KALKAIDKMIEMGAAADPKLLKEAAEAHHK  
Translation\_of\_10 91 QALKAIDKMIEMGAAADPKLLKEAAEAHHK  
Translation\_of\_08 91 EALKAIDKMIEMGAAADPKLLKEAAEAHHK  
Translation\_of\_07 91 QALKAIDKMIEMGAAADPKLLKEAAEAHHK  
Translation\_of\_04 91 KALKAIDKMIEMGAAADPKLLKEAAEAHHK

---

Translation\_of\_L4 121 AIGSISGPNGVTSRADWDVNAALGRVVAS  
Translation\_of\_L1 121 AIGSISGPNGVTSRADWDVNAALGRVVAS

Translation\_of\_16 121 AIGSISGPNGVTSRADWDVNAALGRVVAS  
Translation\_of\_15 121 AIGSISGPNGVTSRADWDVNAALGRVAAS  
Translation\_of\_13 121 AIGSISGPNGVTSRADWDVNAALGRVVAS  
Translation\_of\_12 121 AIGSISGPNGVTSRADWDVNAALGRVVAS  
Translation\_of\_11 121 AIGSISGPNGVTSRADWDVNAALGRVVAS  
Translation\_of\_10 121 AIGSISGPNGVTSRADWDVNAALGRVVAS  
Translation\_of\_08 121 AIGSISGPNGVTSRADWDVNAALGRVAAS  
Translation\_of\_07 121 AIGSISGPNGVTSRADWDVNAALGRVVAS  
Translation\_of\_04 121 AIGSISGPNGVTSRADWDVNAALGRVVAS

---

Translation\_of\_L4 151 VPKAKVMAYDSVKDITDPAVPAYMKSLVN  
Translation\_of\_L1 151 VPKEKVMAYDSVKDITDPKVPAYMKSLVN  
Translation\_of\_16 151 VPKAKVMAYDSVKDITDPTVPAYMKSLVN  
Translation\_of\_15 151 VPKAKVMAYDSVKDITDPKVPAYMKSLVN  
Translation\_of\_13 151 VPKAKVMAYDSVKDITDPKVPAYMKSLVN  
Translation\_of\_12 151 VPKAKVMAYDSVKDITDPKVPAYMKSLVN  
Translation\_of\_11 151 VPKAKVMAYDSVKDITDPKVPAYMKSLVN  
Translation\_of\_10 151 VPKAKVMAYDSVKDITDPKVPAYMKSLVN  
Translation\_of\_08 151 VPKAKVMAYDSVKDITDPKVPAYMKSLVN  
Translation\_of\_07 151 VPKAKVMAYDSVKDITDPKVPAYMKSLVN  
Translation\_of\_04 151 VPKAKVMAYDSVKDITDPKVPAYMKSLVN

---

Translation\_of\_L4 181 GPDAEKAYQAFLEFKDVVAKNQVTTASAPA  
Translation\_of\_L1 181 GPDAEKAYQAFLEFKDVVAKNQVTTASAPA  
Translation\_of\_16 181 GPDAEKAYQAFLEFKDVVAKNQVTTASAPA  
Translation\_of\_15 181 GPDAEKAYQAFLEFKDVVAKNQVTTASAPA  
Translation\_of\_13 181 GPDAEKAYQAFLEFKDVVAKNQVTTASAPA  
Translation\_of\_12 181 GPDAEKAYQAFLEFKDVVAKNQVTTASAPA  
Translation\_of\_11 181 GPDAEKAYQGFLFKDVVAKNQVTSASAPA  
Translation\_of\_10 181 GPDAEKAYQAFLEFKDVVAKNQVTTASAPA  
Translation\_of\_08 181 GPDAEKAYQAFLEFKDVVAKNQVTTASAPA  
Translation\_of\_07 181 GPDAEKAYQAFLEFKDVVAKNQVTTASAPA  
Translation\_of\_04 181 GPDAEKAYQGFLFKDVVAKNQVTSASAPA

---

Translation\_of\_L4 211 VVPSGDKIGAAKALSDASYPFIKIDWLS  
Translation\_of\_L1 211 VVPSGDKIGAAKALSDASYPFIKIDWLS  
Translation\_of\_16 211 VVPSGDKIGAAKALSDASYPFIKIDWLS  
Translation\_of\_15 211 VVPSGDKIGVAAKALSDASYPFIKIDWLS  
Translation\_of\_13 211 VVPSGDKIGVAAKALSDASYPFIKIDWLS  
Translation\_of\_12 211 VVPSGDKIGVAAKALSDASYPFIKIDWLS  
Translation\_of\_11 211 VVPSGDKIGVAAKALSDASYPFIKIDWLS  
Translation\_of\_10 211 VVPSGDKIGAAKALSDASYPFIKIDWLS  
Translation\_of\_08 211 VVPSGDKIGVAAKALSDASYPFIKIDWLS  
Translation\_of\_07 211 VVPSGDKIGAAKALSDASYPFIKIDWLS  
Translation\_of\_04 211 VVPSGDKIGVAAKALSDASYPFIKIDWLS

---

Translation\_of\_L4 241 **DIYLKPLPGKTAPETLKAIDKMIVMGAKMD**  
Translation\_of\_L1 241 **DIYLKPLPGKTAPETLKAIDKMIVMGAKMD**  
Translation\_of\_16 241 **DIYLKPLPGKTAPETLKAIDKMIVMGAKMD**  
Translation\_of\_15 241 **DIYLKPLPGKTAPETLKAIDKMIVMGAKMD**  
Translation\_of\_13 241 **DIYLKPLPGKTAPETLKAIDKMIVMGAKMD**  
Translation\_of\_12 241 **DIYLKPLPGKTAPETLKAIDKMIVMGAKMD**  
Translation\_of\_11 241 **DIYLKPLPGKTAPATLKAIDKMIVMGAKMD**  
Translation\_of\_10 241 **DIYLKPLTGTKAPETLKAIDKMIVMGAKMD**  
Translation\_of\_08 241 **DIYLKPLPGKTAPETLKAIDKMIVMGAKMD**  
Translation\_of\_07 241 **DIYLKPLPGKTAPETLKAIDKMIVMGAKMD**  
Translation\_of\_04 241 **DIYLKPLPGKTAPATLKAVDKMIVMGAKMD**

---

Translation\_of\_L4 271 **GNULLKAAAEAHHKAIGSIDANGVTSAADYE**  
Translation\_of\_L1 271 **GNULLKAAAEAHHKAIGSIDANGVTSADYE**  
Translation\_of\_16 271 **GNULLKAAAEAHHKAIGSIDANGVTSAADYE**  
Translation\_of\_15 271 **GNULLKAAAEAHHKAIGSIDAKGVTSAADYE**  
Translation\_of\_13 271 **GNULLKAAAEAHHKAIGSIDAKGVTSAADYK**  
Translation\_of\_12 271 **GNULLKAAAEARHKAIGSIDAKGVTSAADYE**  
Translation\_of\_11 271 **GNULLKAAAEAHHKAIGSIDAKGVTSAADYE**  
Translation\_of\_10 271 **GNULLKAAAEAHHKAIGSIDANGVTSAADYE**  
Translation\_of\_08 271 **GNULLKAAAEAHHKAIGSIDAKGVTSAADYE**  
Translation\_of\_07 271 **GNULLKAAAEAHHKAIGSIDANGVTSAADYE**  
Translation\_of\_04 271 **GNULLKAAAEAHHKAIGSIDAKGVTSAADYE**

---

Translation\_of\_L4 301 **AVNAALGRLVASVPKSTVMDVYNMAGIVD**  
Translation\_of\_L1 301 **AVNAALGRLVASVPKSTVMDVYNMAKVVD**  
Translation\_of\_16 301 **AVNAALGRLVASVPKSTVMDVYNMAGIVD**  
Translation\_of\_15 301 **AVNAALGRLVASVPKSTVMDVYNPMAGIVD**  
Translation\_of\_13 301 **AVNAALGRLVASVPKSTVMDVYNMAGIVD**  
Translation\_of\_12 301 **AVNAALGRLVASVPKSTVMGVYNMAGIVD**  
Translation\_of\_11 301 **AVNAALGRLVASVPKSTVMDVYNMAGIVD**  
Translation\_of\_10 301 **AVNAALGRLVASVPKSTVMDVYNMAKVVD**  
Translation\_of\_08 301 **AVNAALGRLVASVPKSTVMDVYNPMAGIVD**  
Translation\_of\_07 301 **AVNAALGRLVASVPKSTVMDVYNMAKVVD**  
Translation\_of\_04 301 **AVNAALGRLVASVPKSTVMDVYNMAGIVD**

---

Translation\_of\_L4 331 **STVTNNMFSKVNPLDAMAAAKGFYTFKDVV**  
Translation\_of\_L1 331 **STVTNNMFSKVNPLDAMAAAKGFYTFKDVV**  
Translation\_of\_16 331 **STVTNNMFSKVNPLDAMAAAKGFYTFKDVV**  
Translation\_of\_15 331 **STVTNNMFSKVNPLDAMAAAKGFYTFKDVV**  
Translation\_of\_13 331 **STVTNNMFSKVNPLDAIAAAKGFYTFKDAV**  
Translation\_of\_12 331 **STVTNNMFSKVNPLDAVAAAAGFYTFKDVV**  
Translation\_of\_11 331 **STVTNNMFSKVNPLDAMAAAKGFYTFKDVV**  
Translation\_of\_10 331 **STVTNNMFSKVNPLDAMAAAKGFYTFKDVV**  
Translation\_of\_08 331 **STVTNNMFSKVNPLDAMAAAKGFYTFKDVV**  
Translation\_of\_07 331 **STVTNNMFSKVNPLDAMAAAKGFYTFKDVV**

Translation\_of\_04 331 **STVTNNMF**SKVNP**LDAMAAAKGFYTFKD**VV

---

Translation\_of\_L4 361 **EASQR**

Translation\_of\_L1 361 **EASQR**

Translation\_of\_16 361 **EASQR**

Translation\_of\_15 361 **EASQR**

Translation\_of\_13 361 **EASQR**

Translation\_of\_12 361 **EASQR**

Translation\_of\_11 361 **GASQR**

Translation\_of\_10 361 **EASQR**

Translation\_of\_08 361 **EASQR**

Translation\_of\_07 361 **EASQR**

Translation\_of\_04 361 **EASQR**

---

---
